# Supplementary material for: Persistent Organic Pollutants and Fatty Acid Profile in a Typical Cheese from Extensive Farms: First Assessment of Human Exposure by Dietary Intake
Source: MDPI journal article supplement (doi:10.3390/ani12243476), 2022-12-09
Supplement: s1 [file s1]

**Table S1.** Value of PAH congeners concentration in fresh cheeses.

| PAH congeners      |       |        | Naphtalene | Acenaphthylene | Acenaphthene | Fluorene | Phenanthrene | Anthracene | Fluoranthene | Pyrene | Benzo(a)Anthracene | Chrysene | Benzo(b)Fluoranthene | Benzo(k)Fluoranthene | Benzo(a)Pyrene | Indeno(123cd)Pyrene | Dibenzo(ah)Anthracene | Benzo(ghi)Perylene | ΣPAH  | LMW   | HMW  | LMW/HMW |
|--------------------|-------|--------|------------|----------------|--------------|----------|--------------|------------|--------------|--------|--------------------|----------|----------------------|----------------------|----------------|---------------------|-----------------------|--------------------|-------|-------|------|---------|
| LOD (ng/g )        |       |        | 0.01       | 0.01           | 0.01         | 0.01     | 0.01         | 0.01       | 0.01         | 0.01   | 0.01               | 0.01     | 0.01                 | 0.01                 | 0.01           | 0.01                | 0.01                  | 0.01               |       |       |      |         |
| TEF                | Farm  | Season | 0.001      |                | 0.001        | 0.001    | 0.001        | 0.010      | 0.001        | 0.001  | 0.100              | 0.001    | 0.100                | 0.010                | 1.000          | 0.010               | 1.000                 | 0.100              |       |       |      |         |
| Cheese_1           | A_org | Winter | 6.62       | 0.01           | 1.16         | 1.23     | 0.01         | 0.01       | 0.01         | 0.01   | 0.01               | 0.01     | 0.01                 | 0.01                 | 0.01           | 0.01                | 0.01                  | 0.01               | 9.07  | 9.02  | 0.05 | 180.36  |
| Cheese_2           | B_org | Winter | 0.70       | 0.15           | 0.16         | 0.20     | 0.36         | 0.01       | 0.05         | 0.02   | 0.01               | 0.01     | 0.01                 | 0.01                 | 0.01           | 0.01                | 0.01                  | 0.01               | 1.67  | 1.57  | 0.11 | 14.53   |
| Cheese_3           | C     | Winter | 30.49      | 0.01           | 3.46         | 3.09     | 7.32         | 0.01       | 0.01         | 0.01   | 0.01               | 0.01     | 0.01                 | 0.01                 | 0.01           | 0.01                | 0.01                  | 0.01               | 44.43 | 44.38 | 0.05 | 887.56  |
| Cheese_4           | D     | Winter | 28.04      | 0.01           | 2.22         | 2.31     | 6.57         | 0.28       | 0.63         | 0.76   | 0.01               | 0.01     | 0.01                 | 0.01                 | 0.01           | 0.01                | 0.01                  | 0.01               | 40.85 | 39.42 | 1.43 | 27.51   |
| Cheese_5           | E     | Winter | 7.32       | 0.01           | 3.01         | 5.60     | 9.92         | 0.01       | 0.76         | 0.53   | 0.01               | 0.01     | 0.01                 | 0.01                 | 0.01           | 0.01                | 0.01                  | 0.01               | 27.21 | 25.87 | 1.33 | 19.38   |
| Cheese_6           | F     | Winter | 1.45       | 0.01           | 0.52         | 6.65     | 13.01        | 0.66       | 1.30         | 1.36   | 0.01               | 0.33     | 0.01                 | 0.01                 | 0.01           | 0.01                | 0.01                  | 0.01               | 25.32 | 22.30 | 3.02 | 7.38    |
| Cheese_7           | A_org | Spring | 3.21       | 0.01           | 0.24         | 1.21     | 3.06         | 0.01       | 0.14         | 0.12   | 0.01               | 0.01     | 0.01                 | 0.01                 | 0.01           | 0.01                | 0.01                  | 0.01               | 8.04  | 7.74  | 0.30 | 26.00   |
| Cheese_8           | B_org | Spring | 14.16      | 0.01           | 0.01         | 0.85     | 1.85         | 0.01       | 0.18         | 0.22   | 0.01               | 0.01     | 0.01                 | 0.01                 | 0.01           | 0.01                | 0.01                  | 0.01               | 17.32 | 16.87 | 0.45 | 37.80   |
| Cheese_9           | C     | Spring | 21.72      | 0.01           | 0.56         | 0.84     | 1.75         | 0.01       | 0.24         | 0.25   | 0.01               | 0.01     | 0.01                 | 0.01                 | 0.01           | 0.01                | 0.01                  | 0.01               | 25.41 | 24.88 | 0.53 | 47.04   |
| Cheese_10          | D     | Spring | 3.36       | 0.01           | 0.01         | 0.27     | 0.47         | 0.01       | 0.06         | 0.03   | 0.01               | 0.01     | 0.01                 | 0.01                 | 0.01           | 0.01                | 0.01                  | 0.01               | 4.24  | 4.11  | 0.13 | 32.77   |
| Cheese_11          | E     | Spring | 13.92      | 0.01           | 0.01         | 0.39     | 0.88         | 0.01       | 0.08         | 0.08   | 0.01               | 0.01     | 0.01                 | 0.01                 | 0.01           | 0.01                | 0.01                  | 0.01               | 15.40 | 15.21 | 0.20 | 77.18   |
| Cheese_12          | F     | Spring | 11.61      | 0.74           | 0.01         | 0.73     | 1.69         | 0.01       | 0.19         | 0.08   | 0.01               | 0.01     | 0.01                 | 0.01                 | 0.01           | 0.01                | 0.01                  | 0.01               | 15.09 | 14.78 | 0.32 | 46.75   |
| Cheese_13          | A_org | Summer | 8.30       | 0.01           | 0.01         | 0.34     | 0.56         | 0.01       | 0.07         | 0.06   | 0.01               | 0.01     | 0.01                 | 0.01                 | 0.01           | 0.01                | 0.01                  | 0.01               | 9.38  | 9.21  | 0.17 | 54.80   |
| Cheese_14          | B_org | Summer | 7.92       | 0.01           | 0.01         | 0.47     | 0.70         | 0.01       | 0.05         | 0.09   | 0.01               | 0.01     | 0.01                 | 0.01                 | 0.01           | 0.01                | 0.01                  | 0.01               | 9.30  | 9.11  | 0.18 | 49.55   |
| Cheese_15          | C     | Summer | 0.13       | 0.01           | 0.01         | 0.27     | 1.11         | 0.01       | 0.36         | 0.41   | 0.03               | 0.10     | 0.01                 | 0.01                 | 0.01           | 0.01                | 0.01                  | 0.01               | 2.44  | 1.53  | 0.92 | 1.67    |
| Cheese_16          | D     | Summer | 0.20       | 0.01           | 0.01         | 0.45     | 1.66         | 0.01       | 0.44         | 0.53   | 0.04               | 0.21     | 0.01                 | 0.01                 | 0.01           | 0.01                | 0.01                  | 0.01               | 3.59  | 2.33  | 1.26 | 1.85    |
| Cheese_17          | E     | Summer | 0.13       | 0.01           | 0.01         | 0.11     | 0.58         | 0.01       | 0.31         | 0.38   | 0.03               | 0.11     | 0.01                 | 0.01                 | 0.01           | 0.01                | 0.01                  | 0.01               | 1.69  | 0.83  | 0.86 | 0.96    |
| Cheese_18          | F     | Summer | 0.20       | 0.01           | 0.01         | 0.13     | 0.28         | 0.01       | 0.04         | 0.02   | 0.01               | 0.00     | 0.01                 | 0.01                 | 0.01           | 0.01                | 0.01                  | 0.01               | 0.71  | 0.62  | 0.09 | 6.85    |
| min                |       |        | 0.13       | 0.01           | 0.01         | 0.11     | 0.01         | 0.01       | 0.01         | 0.01   | 0.01               | 0.00     | 0.01                 | 0.01                 | 0.01           | 0.01                | 0.01                  | 0.01               | 0.71  | 0.62  | 0.05 | 0.96    |
| max                |       |        | 30.49      | 0.74           | 3.46         | 6.65     | 13.01        | 0.66       | 1.30         | 1.36   | 0.04               | 0.33     | 0.01                 | 0.01                 | 0.01           | 0.01                | 0.01                  | 0.01               | 44.43 | 44.38 | 3.02 | 887.56  |
| Average            |       |        | 8.86       | 0.05           | 0.63         | 1.40     | 2.88         | 0.06       | 0.27         | 0.28   | 0.01               | 0.05     | 0.01                 | 0.01                 | 0.01           | 0.01                | 0.01                  | 0.01               | 14.51 | 13.88 | 0.63 | 84.44   |
| Standard deviation |       |        | 9.57       | 0.18           | 1.11         | 1.90     | 3.76         | 0.16       | 0.34         | 0.35   | 0.01               | 0.09     | 0.00                 | 0.00                 | 0.00           | 0.00                | 0.00                  | 0.00               | 13.30 | 13.09 | 0.76 | 204.71  |

**Table S2.** Value of PCB congeners concentration in fresh cheeses.

| PCB congeners      |       |        | PCB77 | PCB81 | PCB(114+118) | PCB105 | PCB123 | PCB126 | PCB156 | PCB157 | PCB167 | PCB169 | PCB189 | PCB28 | PCB52 | PCB101 | PCB138 | PCB153 | PCB180 | PCB_TEQ(TCDD) | PCB_ndl | Tot_PCB |
|--------------------|-------|--------|-------|-------|--------------|--------|--------|--------|--------|--------|--------|--------|--------|-------|-------|--------|--------|--------|--------|---------------|---------|---------|
| LOD (ng/g)         |       |        | 0.10  | 0.02  | 0.01         | 0.01   | 0.01   | 0.01   | 0.01   | 0.00   | 0.00   | 0.01   | 0.01   | 0.40  | 0.01  | 0.01   | 0.01   | 0.01   | 0.01   |               |         |         |
| TEF                | Farm  | Season | 1E-04 | 1E-04 | 1E-04        | 1E-04  | 1E-04  | 1E-01  | 5E-04  | 5E-04  | 1E-05  | 1E-02  | 1E-04  |       |       |        |        |        |        |               |         |         |
| Cheese_1           | A_org | Winter | 0.05  | 0.01  | 0.01         | 0.01   | 0.01   | 0.01   | 0.01   | 0.01   | 0.01   | 0.01   | 0.01   | 0.20  | 0.01  | 0.01   | 0.28   | 0.19   | 0.01   | 5.63E-04      | 0.69    | 0.81    |
| Cheese_2           | B_org | Winter | 0.05  | 0.01  | 0.10         | 0.01   | 0.10   | 0.01   | 0.01   | 0.01   | 0.01   | 0.01   | 0.01   | 0.20  | 0.43  | 0.01   | 0.11   | 0.01   | 0.01   | 5.83E-04      | 0.76    | 1.07    |
| Cheese_3           | C     | Winter | 0.05  | 0.01  | 1.91         | 0.01   | 0.01   | 0.01   | 0.01   | 0.01   | 0.01   | 0.01   | 0.01   | 1.55  | 6.83  | 0.01   | 0.01   | 0.01   | 0.01   | 7.54E-04      | 8.40    | 10.43   |
| Cheese_4           | D     | Winter | 0.05  | 0.01  | 1.02         | 0.01   | 0.01   | 0.01   | 0.01   | 0.01   | 0.01   | 0.01   | 0.01   | 0.20  | 6.28  | 0.01   | 0.36   | 0.58   | 0.01   | 6.65E-04      | 7.42    | 8.56    |
| Cheese_5           | E     | Winter | 0.05  | 0.01  | 5.41         | 0.01   | 0.01   | 0.01   | 0.01   | 0.01   | 0.01   | 0.01   | 0.01   | 3.12  | 21.14 | 0.01   | 2.62   | 0.01   | 0.01   | 1.10E-03      | 26.90   | 32.42   |
| Cheese_6           | F     | Winter | 0.05  | 0.01  | 2.52         | 0.01   | 0.01   | 0.01   | 0.01   | 0.01   | 0.01   | 0.01   | 0.01   | 5.22  | 29.37 | 0.01   | 1.42   | 1.46   | 0.18   | 8.15E-04      | 37.65   | 40.44   |
| Cheese_7           | A_org | Spring | 0.05  | 0.01  | 1.45         | 0.01   | 0.01   | 0.01   | 0.01   | 0.01   | 0.01   | 0.01   | 0.01   | 0.20  | 0.01  | 0.01   | 0.27   | 0.01   | 0.01   | 7.08E-04      | 0.49    | 2.06    |
| Cheese_8           | B_org | Spring | 0.05  | 0.01  | 2.36         | 0.01   | 0.01   | 0.01   | 0.01   | 0.01   | 0.01   | 0.01   | 0.01   | 0.20  | 0.01  | 0.01   | 0.01   | 0.01   | 0.01   | 7.98E-04      | 0.23    | 2.70    |
| Cheese_9           | C     | Spring | 0.05  | 0.01  | 0.01         | 0.01   | 0.01   | 0.01   | 0.01   | 0.01   | 0.01   | 0.01   | 0.01   | 0.20  | 2.25  | 0.01   | 0.47   | 0.01   | 0.01   | 5.63E-04      | 2.94    | 3.06    |
| Cheese_10          | D     | Spring | 0.05  | 0.01  | 0.01         | 0.01   | 0.01   | 0.01   | 0.01   | 0.01   | 0.01   | 0.01   | 0.01   | 0.20  | 0.18  | 0.01   | 0.01   | 0.01   | 0.01   | 5.63E-04      | 0.40    | 0.52    |
| Cheese_11          | E     | Spring | 0.05  | 0.01  | 0.01         | 0.01   | 0.01   | 0.01   | 0.01   | 0.01   | 0.01   | 0.01   | 0.01   | 0.20  | 0.50  | 0.01   | 0.22   | 0.01   | 0.01   | 5.63E-04      | 0.94    | 1.06    |
| Cheese_12          | F     | Spring | 0.05  | 0.01  | 0.31         | 0.01   | 0.01   | 0.01   | 0.01   | 0.01   | 0.01   | 0.01   | 0.01   | 0.20  | 0.81  | 0.01   | 0.18   | 0.18   | 0.01   | 5.94E-04      | 1.38    | 1.81    |
| Cheese_13          | A_org | Summer | 0.05  | 0.01  | 3.00         | 0.01   | 0.01   | 0.01   | 0.01   | 0.01   | 0.01   | 0.01   | 0.01   | 0.20  | 0.47  | 0.01   | 0.28   | 0.01   | 0.01   | 8.63E-04      | 0.96    | 4.08    |
| Cheese_14          | B_org | Summer | 0.05  | 0.01  | 0.53         | 0.01   | 0.57   | 0.01   | 0.01   | 0.01   | 0.01   | 0.01   | 0.01   | 0.20  | 0.64  | 0.25   | 0.17   | 0.41   | 0.01   | 6.73E-04      | 1.68    | 2.89    |
| Cheese_15          | C     | Summer | 0.05  | 0.01  | 0.10         | 0.01   | 0.12   | 0.01   | 0.01   | 0.01   | 0.01   | 0.01   | 0.01   | 0.20  | 0.11  | 0.01   | 0.19   | 0.01   | 0.01   | 5.84E-04      | 0.52    | 0.85    |
| Cheese_16          | D     | Summer | 0.05  | 0.01  | 0.18         | 0.01   | 0.01   | 0.01   | 0.01   | 0.01   | 0.01   | 0.01   | 0.01   | 0.20  | 0.13  | 0.01   | 0.20   | 0.01   | 0.01   | 5.80E-04      | 0.54    | 0.84    |
| Cheese_17          | E     | Summer | 0.05  | 0.01  | 0.11         | 0.01   | 0.12   | 0.01   | 0.01   | 0.01   | 0.01   | 0.01   | 0.01   | 0.20  | 0.15  | 0.01   | 0.16   | 0.01   | 0.01   | 5.85E-04      | 0.52    | 0.87    |
| Cheese_18          | F     | Summer | 0.05  | 0.01  | 0.01         | 0.01   | 0.01   | 0.01   | 0.01   | 0.01   | 0.01   | 0.01   | 0.01   | 0.20  | 0.01  | 0.01   | 0.01   | 0.01   | 0.01   | 5.63E-04      | 0.23    | 0.35    |
| min                |       |        | 0.05  | 0.01  | 0.01         | 0.01   | 0.01   | 0.01   | 0.01   | 0.01   | 0.01   | 0.01   | 0.01   | 0.20  | 0.01  | 0.01   | 0.01   | 0.01   | 0.01   | 0.00          | 0.23    | 0.35    |
| max                |       |        | 0.05  | 0.01  | 5.41         | 0.01   | 0.57   | 0.01   | 0.01   | 0.01   | 0.01   | 0.01   | 0.01   | 5.22  | 29.37 | 0.25   | 2.62   | 1.46   | 0.18   | 0.00          | 37.65   | 40.44   |
| average            |       |        | 0.05  | 0.01  | 1.06         | 0.01   | 0.05   | 0.01   | 0.01   | 0.01   | 0.01   | 0.01   | 0.01   | 0.72  | 3.85  | 0.02   | 0.39   | 0.16   | 0.01   | 0.00          | 5.15    | 6.38    |
| Standard deviation |       |        | 0.00  | 0.00  | 1.48         | 0.00   | 0.14   | 0.00   | 0.00   | 0.00   | 0.00   | 0.00   | 0.00   | 1.34  | 8.17  | 0.06   | 0.64   | 0.36   | 0.04   | 0.00          | 10.31   | 11.35   |

**Table S3.** Values of contaminants concentration occurrence in fresh cheese samples.  $\Sigma$ PAH\*,  $\Sigma$ PCB\*,  $\Sigma$ ndl-PCB\*, PCB\_TEQ\* values are normalised at fat gram

| Sample ID          | Farm  | Season* | $\Sigma$ PAH<br>(ng/g) | $\Sigma$ PCB<br>(ng/g) | B(a)Py_TEQ<br>(ng/g) | $\Sigma$ ndl-PCB<br>(ng/g) | PCB_TEQ<br>(ng/g) | $\Sigma$ PAH*<br>(ng/g fat) | $\Sigma$ PCB*<br>(ng/g fat) | $\Sigma$ ndl-PCB*<br>(ng/g fat) | PCB_TEQ*<br>(ng/g fat) |
|--------------------|-------|---------|------------------------|------------------------|----------------------|----------------------------|-------------------|-----------------------------|-----------------------------|---------------------------------|------------------------|
| Cheese_1           | A_org | Winter  | 5.34                   | 0.48                   | 1.22E-02             | 4.11E-01                   | 3.32E-04          | 21.31                       | 1.90                        | 1.62                            | 1.32E-03               |
| Cheese_2           | B_org | Winter  | 1.02                   | 0.65                   | 8.01E-03             | 4.68E-01                   | 3.55E-04          | 4.01                        | 2.57                        | 1.81                            | 1.39E-03               |
| Cheese_3           | C     | Winter  | 27.72                  | 6.51                   | 3.50E-02             | 5.25E+00                   | 4.70E-04          | 105.81                      | 24.84                       | 20.01                           | 1.80E-03               |
| Cheese_4           | D     | Winter  | 24.70                  | 5.18                   | 3.32E-02             | 4.49E+00                   | 4.02E-04          | 90.59                       | 18.98                       | 16.46                           | 1.47E-03               |
| Cheese_5           | E     | Winter  | 16.75                  | 19.96                  | 2.39E-02             | 1.66E+01                   | 6.79E-04          | 58.97                       | 70.27                       | 58.30                           | 2.39E-03               |
| Cheese_6           | F     | Winter  | 15.64                  | 24.97                  | 2.65E-02             | 2.34E+01                   | 5.03E-04          | 61.73                       | 98.60                       | 91.81                           | 1.99E-03               |
| Cheese_7           | A_org | Spring  | 5.02                   | 1.29                   | 1.23E-02             | 3.13E-01                   | 4.42E-04          | 17.78                       | 4.55                        | 1.09                            | 1.57E-03               |
| Cheese_8           | B_org | Spring  | 11.06                  | 1.72                   | 1.85E-02             | 1.50E-01                   | 5.10E-04          | 41.16                       | 6.41                        | 0.53                            | 1.90E-03               |
| Cheese_9           | C     | Spring  | 15.01                  | 1.81                   | 2.19E-02             | 1.74E+00                   | 3.33E-04          | 72.49                       | 8.73                        | 8.39                            | 1.61E-03               |
| Cheese_10          | D     | Spring  | 2.58                   | 0.32                   | 9.63E-03             | 2.50E-01                   | 3.42E-04          | 9.79                        | 1.20                        | 0.93                            | 1.30E-03               |
| Cheese_11          | E     | Spring  | 9.77                   | 0.67                   | 1.71E-02             | 6.03E-01                   | 3.57E-04          | 38.68                       | 2.67                        | 2.36                            | 1.41E-03               |
| Cheese_12          | F     | Spring  | 10.35                  | 1.24                   | 1.78E-02             | 9.55E-01                   | 4.07E-04          | 37.57                       | 4.51                        | 3.45                            | 1.48E-03               |
| Cheese_13          | A_org | Summer  | 5.64                   | 2.45                   | 1.26E-02             | 5.85E-01                   | 5.19E-04          | 21.68                       | 9.43                        | 2.23                            | 1.99E-03               |
| Cheese_14          | B_org | Summer  | 6.00                   | 1.87                   | 1.35E-02             | 1.09E+00                   | 4.34E-04          | 20.29                       | 6.31                        | 3.66                            | 1.47E-03               |
| Cheese_15          | C     | Summer  | 1.53                   | 0.53                   | 1.01E-02             | 3.31E-01                   | 3.66E-04          | 5.63                        | 1.95                        | 1.19                            | 1.34E-03               |
| Cheese_16          | D     | Summer  | 2.36                   | 0.55                   | 1.24E-02             | 3.65E-01                   | 3.82E-04          | 8.23                        | 1.92                        | 1.25                            | 1.33E-03               |
| Cheese_17          | E     | Summer  | 1.08                   | 0.55                   | 1.01E-02             | 3.40E-01                   | 3.74E-04          | 3.76                        | 1.93                        | 1.16                            | 1.30E-03               |
| Cheese_18          | F     | Summer  | 0.47                   | 0.23                   | 8.09E-03             | 1.54E-01                   | 3.70E-04          | 1.76                        | 0.85                        | 0.56                            | 1.39E-03               |
| min                |       |         | 0.47                   | 0.23                   | 8.01E-03             | 1.50E-01                   | 3.32E-04          | 1.76                        | 0.85                        | 0.53                            | 1.30E-03               |
| max                |       |         | 27.72                  | 24.97                  | 3.50E-02             | 2.34E+01                   | 6.79E-04          | 105.81                      | 98.60                       | 91.81                           | 2.39E-03               |
| Average            |       |         | 9.00                   | 3.94                   | 1.68E-02             | 3.19E+00                   | 4.21E-04          | 34.51                       | 14.87                       | 12.04                           | 1.58E-03               |
| Standard deviation |       |         | 8.17                   | 7.00                   | 8.25E-03             | 6.38E+00                   | 8.89E-05          | 31.61                       | 26.54                       | 24.26                           | 3.08E-04               |
